# Supplementary material for: Effects of Fisetin, a Plant-Derived Flavonoid, on Response to Oxidative Stress, Aging, and Age-Related Diseases in Caenorhabditis elegans
Source: MDPI journal article supplement (doi:10.3390/ph15121528), 2022-12-08
Supplement: s1 [file s1]

**Table S1.** Effect of fisetin on lifespan of *C. elegans*.

|                            | <b>Fisetin (g/L)</b> | <b>Mean lifespan (d)</b> | <b><i>P</i> value<sup>1)</sup></b> | <b>% effect<sup>2)</sup></b> |
|----------------------------|----------------------|--------------------------|------------------------------------|------------------------------|
| 1 <sup>st</sup> experiment | 0                    | 20.4                     |                                    |                              |
|                            | 0.1                  | 22.4                     | 0.001                              | 9.8                          |
| 2 <sup>nd</sup> experiment | 0                    | 18.2                     |                                    |                              |
|                            | 0.1                  | 21.8                     | < 0.001                            | 20.1                         |
| 3 <sup>rd</sup> experiment | 0                    | 20.2                     |                                    |                              |
|                            | 0.1                  | 23.0                     | < 0.001                            | 13.8                         |

<sup>1)</sup> *P* value was calculated using the log-rank test by comparing the survival of untreated control group (0 g/L fisetin) to that of fisetin-treated group (0.1 g/L fisetin).

<sup>2)</sup> % effects were calculated by  $(C-P)/C \times 100$ , where *P* is the mean lifespan of fisetin-treated group and *C* is the mean lifespan of untreated control group.

**Table S2.** Effects of fisetin and RNAi of *daf-16/skn-1* on A $\beta$ -induced toxicity in *C. elegans*.

|                            | <b>Fisetin (g/L)</b> | <b>RNAi</b>   | <b>Time when 50% of worms were paralyzed (h)</b> | <b><i>P</i> value<sup>1)</sup></b> | <b>% effect<sup>2)</sup></b> |
|----------------------------|----------------------|---------------|--------------------------------------------------|------------------------------------|------------------------------|
| 1 <sup>st</sup> experiment | 0                    | EV            | 4.9                                              |                                    |                              |
|                            | 0.1                  | EV            | 7.5                                              | < 0.001                            | 52.9                         |
|                            | 0                    | <i>daf-16</i> | 5.2                                              |                                    |                              |
|                            | 0.1                  | <i>daf-16</i> | 5.6                                              | 0.448                              | 8.7                          |
|                            | 0                    | <i>skn-1</i>  | 5.1                                              |                                    |                              |
|                            | 0.1                  | <i>skn-1</i>  | 4.7                                              | 0.426                              | -7.8                         |
| 2 <sup>nd</sup> experiment | 0                    | EV            | 5.5                                              |                                    |                              |
|                            | 0.1                  | EV            | 6.9                                              | 0.013                              | 25.5                         |

|                            |     |               |     |       |       |
|----------------------------|-----|---------------|-----|-------|-------|
|                            | 0   | <i>daf-16</i> | 5.4 |       |       |
|                            | 0.1 | <i>daf-16</i> | 4.8 | 0.451 | -11.1 |
|                            | 0   | <i>skn-1</i>  | 6.5 |       |       |
|                            | 0.1 | <i>skn-1</i>  | 5.6 | 0.215 | -13.3 |
| 3 <sup>rd</sup> experiment | 0   | EV            | 4.9 |       |       |
|                            | 0.1 | EV            | 6.4 | 0.004 | 32.0  |
|                            | 0   | <i>daf-16</i> | 5.4 |       |       |
|                            | 0.1 | <i>daf-16</i> | 4.9 | 0.263 | -8.6  |
|                            | 0   | <i>skn-1</i>  | 7.1 |       |       |
|                            | 0.1 | <i>skn-1</i>  | 7.4 | 0.453 | 3.7   |

<sup>1)</sup> *P* value was calculated using the log-rank test by comparing the rate of paralysis in untreated control group (0 g/L fisetin) to that in fisetin-treated group (0.1 g/L fisetin).

<sup>2)</sup> % effects were calculated by  $(C-P)/C \times 100$ , where *P* is the mean lifespan of fisetin-treated group and *C* is the mean lifespan of untreated control group.

**Table S3.** Effects of fisetin and *skn-1* RNAi on reduced lifespan by HGD.

|                            | Supplementation | RNAi         | Mean lifespan (d) | <i>P</i> value        |
|----------------------------|-----------------|--------------|-------------------|-----------------------|
| 1 <sup>st</sup> experiment |                 | EV           | 18.8              |                       |
|                            | HGD             | EV           | 12.9              | < 0.001 <sup>1)</sup> |
|                            | HGD + FT        | EV           | 18.3              | < 0.001 <sup>2)</sup> |
|                            |                 | <i>skn-1</i> | 18.3              |                       |
|                            | HGD             | <i>skn-1</i> | 13.1              | < 0.001 <sup>1)</sup> |
|                            | HGD + FT        | <i>skn-1</i> | 14.6              | 0.054 <sup>2)</sup>   |
| 2 <sup>nd</sup> experiment |                 | EV           | 19.9              |                       |
|                            | HGD             | EV           | 17.1              | < 0.001 <sup>1)</sup> |
|                            | HGD + FT        | EV           | 19.8              | < 0.001 <sup>2)</sup> |
|                            |                 | <i>skn-1</i> | 17.2              |                       |
|                            | HGD             | <i>skn-1</i> | 15.4              | < 0.001 <sup>1)</sup> |
|                            | HGD + FT        | <i>skn-1</i> | 15.6              | 0.360 <sup>2)</sup>   |
| 3 <sup>rd</sup> experiment |                 | EV           | 23.4              |                       |
|                            | HGD             | EV           | 19.4              | < 0.001 <sup>1)</sup> |
|                            | HGD + FT        | EV           | 23.8              | < 0.001 <sup>2)</sup> |
|                            |                 | <i>skn-1</i> | 20.1              |                       |
|                            | HGD             | <i>skn-1</i> | 16.6              | < 0.001 <sup>1)</sup> |
|                            | HGD + FT        | <i>skn-1</i> | 17.5              | 0.069 <sup>2)</sup>   |

<sup>1)</sup> *P* value was calculated using the log-rank test by comparing the survivals of no supplementation and HGD only with the same RNAi clone.

<sup>2)</sup> *P* value was calculated using the log-rank test by comparing the survivals of HGD only and HGD + FS with the same RNAi clone.

HGD, high glucose diet (40 mM glucose); FT, fisetin (0.1 g/L).

**Table S4.** Effect of fisetin on degeneration of dopaminergic neurons.

|                            | Supplementation | Relative fluorescence (%) | <i>P</i> value        |
|----------------------------|-----------------|---------------------------|-----------------------|
| 1 <sup>st</sup> experiment |                 | 100.0 ± 3.27              |                       |
|                            | 6-OHDA          | 65.4 ± 2.96               | < 0.001 <sup>1)</sup> |
|                            | 6-OHDA + L-DOPA | 89.4 ± 4.91               | < 0.001 <sup>2)</sup> |
|                            | 6-OHDA + FT     | 87.4 ± 3.36               | < 0.001 <sup>2)</sup> |
| 2 <sup>nd</sup> experiment |                 | 100.0 ± 2.63              |                       |
|                            | 6-OHDA          | 61.5 ± 4.12               | < 0.001 <sup>1)</sup> |
|                            | 6-OHDA + L-DOPA | 84.5 ± 4.17               | < 0.001 <sup>2)</sup> |
|                            | 6-OHDA + FT     | 71.6 ± 3.36               | 0.021 <sup>2)</sup>   |
| 3 <sup>rd</sup> experiment |                 | 100.0 ± 2.17              |                       |
|                            | 6-OHDA          | 67.2 ± 2.64               | < 0.001 <sup>1)</sup> |
|                            | 6-OHDA + L-DOPA | 102.0 ± 3.66              | < 0.001 <sup>2)</sup> |
|                            | 6-OHDA + FT     | 91.8 ± 3.27               | < 0.001 <sup>2)</sup> |

<sup>1)</sup> *P* value was calculated using the Student's *t* test by comparing to untreated control.

<sup>2)</sup> *P* value was calculated using the Student's *t* test by comparing to 6-OHDA-treated group.

6-OHDA, 6-hydroxydopamine hydrobromide; L-DOPA, L-3,4-dihydroxyphenylalanine; FT, fisetin (0.1 g/L).

**Table S5.** Effect of *daf-16* or *bec-1* knockdown on lifespan extension by fisetin.

|                            | RNAi          | Mean lifespan (d) |      | <i>P</i> value <sup>1)</sup> |
|----------------------------|---------------|-------------------|------|------------------------------|
|                            |               | Control           | FT   |                              |
| 1 <sup>st</sup> experiment | <i>daf-16</i> | 12.3              | 12.0 | 0.746                        |
|                            | <i>bec-1</i>  | 18.8              | 17.5 | 0.155                        |

|                            |               |      |      |       |
|----------------------------|---------------|------|------|-------|
| 2 <sup>nd</sup> experiment | <i>daf-16</i> | 10.2 | 10.2 | 0.714 |
|                            | <i>bec-1</i>  | 18.1 | 18.7 | 0.913 |
| 3 <sup>rd</sup> experiment | <i>daf-16</i> | 11.4 | 11.3 | 0.392 |
|                            | <i>bec-1</i>  | 17.2 | 15.0 | 0.064 |

<sup>1)</sup> *P* value was calculated using the log-rank test by comparing the survival of the untreated control group (0 g/L fisetin) to that of fisetin-treated group (0.1 g/L fisetin).

FT, fisetin (0.1 g/L).

**Table S6.** Primer set of each gene used for quantitative RT-PCR.

| Gene Name    | Primer  | Sequence                                |
|--------------|---------|-----------------------------------------|
| <i>ama-1</i> | forward | 5'-CGG AGC AGC CAG GAA CTT C-3'         |
|              | reverse | 5'-AAC GGG AAA AAT CTT ATG AAT-3'       |
| <i>skn-1</i> | forward | 5'-CTC TCT TCT GGC ATC CTC TAC CA-3'    |
|              | reverse | 5'-TTC TTG GAT TCT TCT TCT TGT TCG T-3' |
| <i>ctl-1</i> | forward | 5'-AAT GGA TAC GGA GCG CAT AC-3'        |
|              | reverse | 5'-GCG TCA GTT GGA TCG AGA TT-3'        |
| <i>sod-3</i> | forward | 5'-TGG TGG TGG ACA CAT CAA TC-3'        |
|              | reverse | 5'-ACC GAA GTC GCG CTT AAT AG-3'        |
| <i>gst-4</i> | forward | 5'-GCT GAA GCC AAC GAC TCC AT-3'        |
|              | reverse | 5'-GAC CGA ATT GTT CTC CAT CGA-3'       |
| <i>bec-1</i> | forward | 5'-AGG AGC TGG AGC AAC AGT TGA AGA-3'   |
|              | reverse | 5'-ATA TTG ACG TTC GGC TTC CAG CGA-3'   |
| <i>lgg-1</i> | forward | 5'-AAC AAC TTT GAG AAG CGT CGT GCC-3'   |
|              | reverse | 5'-TCT TCT GGA CGA AGT TGG ATG CGT-3'   |
